# Supplementary material for: Evaluation of the Impact of Delayed in Diagnosis and Initiation of Antiretroviral Therapy for HIV-1 Infected Infants on Their Viral Load (Viraemia) and CD4 T Lymphocyte Cell Status Outcome in the Gambia.
Source: Research Square preprint supplement (doi:10.21203/rs.3.rs-151035/v1), 2021-01-21
Supplement: Supplementary file 1 [file 489aa1bfbc06dd1fcaed30da.xlsx]

## Sheet: Sheet1
CenterName	PMTCTN0	Study code	Gender	Nationality	DateTested	Test Result	Date ART was initiated	ART status	Initial CD4 Cont	Date Initia lCD4 Tested	Initial viraemia count	Date Initial viraemia Tested	Survival status	Prospective CD4 count	Date prosp. CD4 tested	Prospective viraemia count	Date prosp. Viraemia tested	Time01	Time02	Time03	Time04	Time05	Time06	Comments
HOC/BRIKAMA/	20090708	P1	M	Gambian	2015-04-04	S1	5/21/2015	Default	NA		NA		NA					7	1	4	2	8	16	Transfer out to BSG Hosp.11/17/2015 but not trace at BSG ART clinic
HOC/BRIKAMA	20120109	P2	M	Gambian	2015-04-04	S1	5/21/2015	Default	NA		NA		NA					39	1	4	2	8	47	mother-child pair default since 2016
HOC/BRIKAMA	20131005	P3	M	Gambian	12/24/2015	S1	11/23/2017	Complete Adherence	1256	6/16/2016	455759	6/16/2016	Alive	283	2019-11-11	912011	.11/11/2019	28	4	4	95	104	132
HOC/BRIKAMA	20150106	P4	F	Gambian	2015-04-04	S1	Not initiated on ART	Not initiated on ART	NA		NA		Death					49	5	4	0	0		Mother-child pair default since April 2014 reason Denial, only seen sample collected date when the sick and admited then Died 7/4/2015 before results was received
HOC/BRIKAMA	20150577(76)	P5	M	Gambian	2/24/2018	S1	2018-07-10	Complete Adherence	NA		NA		Alive	1366	1/29/2020	2.04174e+06	1/29/2020	35	62	0	18	81	117
HOC/BRIKAMA	20160038	P6	M	Gambian	4/21/2016	S1	Not initiated on ART	Loss to follow-up	NA		NA		NA					56	10	4	0	0		mother-child pair Loss to follow-up before result was receive at ART clinic i.e. since 2/17/2016
HOC/BRIKAMA	20120458	P7	F	Gambian	4/21/2016	S1	Not initiated on ART	Not initiated on ART	NA		NA		Death					18	4	4	0	0		Died june 2016 before ART was Started mother was catch up post delivery
HOC/BRIKAMA	20160166	P8	F	Senegalese	2016-02-07	S1	7/21/2016	Default	NA		NA		Death					1	3	2	0	6	7	Mother-child pair daulted since 8/22/2016 reasons travels to senegal and the child died in November 2017 at home during the dfault period
HOC/BRIKAMA	20100299	P9	F	Gambian	2016-09-08	S1	2016-02-11	Complete Adherence	>2000	2/16/2017	Target not detected	2019-11-04	Alive	236	11/18/2019	7.94328e+06	11/18/2019	13	3	3	9	16	29
HOC/BRIKAMA	20150584	P10	F	Gambian	2016-09-08	S1	2016-09-07	Complete Adherence	1459	2016-08-12	NA	2016-08-12	Alive	un able to run	2019-11-11	8709.64	.11/11/2019	11	3	3	1	8	19
HOC/BRIKAMA	20100658	P11	F	Senegalese	2016-09-08	S1	10/20/2016	Default	817	NA	106700	NA	Death					21	1	3	7	12	33	Died 1/19/2019 on admition mother-child pair Default the whole of 2018 reason traval to casamance
HOC/BRIKAMA	20130939	P12	F	Gambian	2016-09-08	S1	2017-12-01	Complete Adherence	1279	2019-03-09	NA	2019-03-09	Alive	598	11/18/2019	Target Target not detected	11/18/2019	9	1	3	19	24	33
HOC/BRIKAMA	20160073	P13	M	Gambian	3/22/2018	S1	Not initiated on ART	Loss to follow-up	NA		NA		NA					11	82	1	0	0		mother-child pair Lost to follow before the receipt of results at ART clinic to date i.e.since 9/19/2016 before results was received
HOC/BRIKAMA	20110426	P14	M	Gambian	3/22/2018	S1	2018-11-06	Complete Adherence	>2000	6/27/2018	Target not detected	6/27/2018	Alive	551	11/18/2019	14454.4	11/18/2019	20	81	1	9	92	113
HOC/BRIKAMA	20130047	P15	F	Gambian	3/22/2018	S1	2018-05-04	Default	1380		NA		Alive					7	80	1	0	82	89	Child default since 7/23/2018 due to the death of the mother and Currently in Basse with a guardian who deny perticipation and continuation of RX for the child
HOC/BRIKAMA	20120221	P16	F	Gambian	3/22/2018	S1	Not initiated on ART	Loss to follow-up	NA		NA		NA					67	79	1	0	0		mother-child pair Loss to follow-up before the receive of results at ART clinic to date i.e. since 9/6/2017
HOC/BRIKAMA	20140217	P17	F	Nigerian	3/22/2018	S1	Not initiated on ART	Loss to follow-up	NA		NA		NA					62	78	1	0	0		mother-child pair Loss to follow-up before the receipt of result at ART clinic to date i.e. since 1/22/2018
HOC/BRIKAMA	20160043	P18	M	Senegalese	3/22/2018	S1	2018-04-04	Default	1842	NA	NA		Death					32	72	1	0	74	106	Mother-child pair default since after delivery reason travel to casamance to date DBS collected bcos child was sick an admitted then died 6/13/2018
HOC/BRIKAMA	20160555	P19	F	Senegalese	3/22/2018	S1	Not initiated on ART	Not initiated on ART	331	NA	309051	NA	Death					65	68	1	0	0		Mother-child pair default since after delivery to date DBS collected reason travel to casamance child died in January 2017 before result was received at the ART clinic
HOC/BRIKAMA	20110776	P20	F	Gambian	3/22/2018	S1	Not initiated on ART	Loss to follow-up	NA		NA		NA					9	58	1	0	0		mother-child pair Lost to follow up before the receipt of result at the ART clinic i.e. since May 2017
HOC/BRIKAMA	20170020	P21	M	Gambian	2018-01-02	S1	Not initiated on ART	Loss to follow-up	NA		NA		NA					5	29	4	0	0		mother-child Loss to follow-up before received of results to date i.e. since 11/22/2017
HOC/BRIKAMA	20060195	P22	F	Gambian	1/24/2018	S1	Not initiated on ART	Not initiated on ART	NA		NA		Death					13	23	1	0	0		Mother intermentently default reason denial and the child Died 1/10/2018 before result received at ART clinic
HOC/BRIKAMA	20090683	P23	F	Gambian	1/24/2018	S1	2018-05-02	Complete Adherence	1152	2018-05-09	11673	2018-05-09	Alive	1041	2020-03-02	89125.1	.3/2/2020	9	23	1	0	24	34
HOC/BRIKAMA	20170031	P24	F	Gambian	1/24/2018	S1	Not initiated on ART	Not initiated on ART	NA		NA		Death					10	22	1	0	0		Mother default intermintently during pregnancy reason Denial CHILD Died 12/14/2017 before result was received at ART clinic
HOC/BRIKAMA	20160345	P25	F	Gambian	3/22/2018	S1	2018-04-04	Complete Adherence	>2000		NA		Alive					44	72	1	0	74	118
HOC/BRIKAMA	20100951	P26	M	Gambian	2018-01-02	S1	4/16/2018	Complete Adherence	1436	4/18/2018	Target not detected	4/18/2018	Alive	un able to run	11/26/2019	1.09648e+06	11/26/2019	15	2	4	6	12	28
HOC/BRIKAMA	20170528	P27	M	Gambian	2018-09-05	S1	Not initiated on ART	Not initiated on ART	NA		NA		Death					19	13	6	0	0		Died 7/24/2018 approx. 1 month after the received of result but recorded SO 6/26/18 in mother RX folder that prevent ART start for the child till death.
HOC/BRIKAMA	20180271	P28	M	Gambian	11/13/2018	S1	Not initiated on ART	Loss to follow-up	NA		NA		Alive					17	10	1	0	0		mother-child pair Loss to follow-up since 9/3/2018 before result was received reasons both parents are not together and the father confirmed the child is alive
HOC/BRIKAMA	20180379	P29	F	Gambian	11/13/2018	S1	Not initiated on ART	Not initiated on ART	NA		NA		Death					20	5	1	0	0		mother was catch up post delivery and child Died 10/11/18 before result was received
HOC/BRIKAMA	20160303	P30	F	Gambian	1/23/2019	S1	1/30/2019	Complete Adherence	1742	1/30/2019	Target not detected	1/30/2019	Alive	1259	2020-08-01	Target not detected	2020-08-01	13	3	0	0	4	18
HOC/BRIKAMA	20160338	P31	F	Gambian	1/23/2019	S1	1/30/2019	Complete Adherence	1304	1/30/2019	41780	1/30/2019	Alive	574	2020-08-01	891251	.8/1/2020	40	3	0	0	4	45
HOC/BRIKAMA	20190018	P32	F	Gambian	11/13/2018	S1	1/16/2019	Complete Adherence	1350	NA	Target not detected	NA	Alive					11	4	1	7	13	25
HOC/BRIKAMA	20180321	P33	M	Gambian	5/29/2019	S1	2019-12-06	Complete Adherence	1198	2019-10-04	Target not detected	2019-03-04	Alive	1262	12/23/2019	9549.93	12/23/2019	34	6	1	0	8	42
HOC/BRIKAMA	20180447	P34	F	Gambian	5/29/2019	S1	2019-10-07	Complete Adherence	>2000	NA	22412	NA	Alive					18	2	1	4	8	26
HOC/BRIKAMA	20190180	P35	M	Gambian	5/30/2019	S1	2019-10-07	Complete Adherence	1956	7/22/2019	NA	7/22/2019	Alive	un able to run	2020-09-01	1.14815e+06	.9/1/2020	58	1	1	4	7	65
HOC/BRIKAMA	20160166	P36	M	Gambian	2020-03-01	S1	1/13/2020	Complete Adherence	NA		NA		Alive					6	1	0	1	3	9
HOC/BRIKAMA	20060156	P37	M	Gambian	2020-03-01	S1	1/27/2020	Complete Adherence	>2000		NA		Alive					11	0	0	3	4	15
HOC/BRIKAMA	SIBNOR 1999/2015	P38	M	Gambian	2018-01-02	S1	2018-05-10	Complete Adherence	590	5/15/2019	592595	5/15/2019	Alive	un able to run	2020-04-02	758578	.4/2/2020	11	46	3	32	81	93
SOMA	213/2016	P39	F	Senegalese	5/24/2016	S1	Not initiated on ART	Not initiated on ART	NA		NA		Death					22	5	3	0	0		child Died 6/21/2016 A day after the receive of result at ART clinic. The mother was catched-up at post delivery
SOMA	196A/2016	P40	F	Gambian	5/24/2016	S1	8/30/2016	Default	890	8/30/2016	NA		Alive	1155	3/17/2020	7585.78	2020-03-17	25	7	3	10	21	46	child Default from April to july 2019 due to the death of the mother 4/15/2016 but resume ARTAugust 2019
SOMA	647/2017	P41	M	Senegalese	3/22/2018	S1	Not initiated on ART	Not initiated on ART	NA		NA		Death					44	23	1	0	0		Mother default since after delivery reason travel to casamance and child Died 1/20/2018 on admission before result was rceived
SOMA	129/2017	P42	F	Senegalese	1/24/2018	S1	Not initiated on ART	Loss to follow-up	NA		NA		NA					6	29	6	0	0		mother-child pair Loss to follow-up before the receipt of results at ART clinic) i.e. since after sample collection as the mother is said to return to Senegal before result was received
SOMA	118/2016	P43	M	Gambian	3/22/2018	S1	Not initiated on ART	Loss to follow-up	NA		NA		NA					7	83	1	0	0		Mother-child pair Lost to folow up before the receipt of result at ART clinic i.e. since after sample collection as the child-mother pair is said to travel to UK before result was received
SOMA	527/2018	P44	F	Senegalese	2018-11-09	S1	9/27/2019	Default	616	NA	NA		NA					35	4	28	26	59	94	Mothe default since 4/3/2019 to 9/26/19 and after ART started for the child as the mother return to cassamance
SOMA	266/2019	P45	F	Gambian	9/18/2019	S1	2019-08-10	Complete Adherence	NA		NA		Alive					6	0	0	2	2	9
SOMA	20190130	P46	F	Gambian	10/25/2019	S1	2019-12-11	Complete Adherence	238	NA	NA		Alive					11	0	0	2	2	13
SOMA	2020008	P47	M	Gambian	10/30/2019	S1	1/21/2020	Complete Adherence	NA		NA		Alive					13	0	0	11	12	25
SOMA	20200002	P48	F	Gambian	12/31/2019	S1	2020-01-01	Complete Adherence	NA		NA		Alive					33	1	0	0	1	35
FARAFENI	0023/2017	P49	F	Gambian	1/22/2018	S1	Not initiated on ART	Loss to follow-up	NA		NA		NA					6	3	6	0	0		mother-child pair Loss to follow-up since 2018 as the mother completely default on ART since 2018 reson denial
FARAFENI	0307/2018	P50	M	Gambian	4/26/2019	S1	11/20/2019	Complete Adherence	NA		NA		Alive					5	19	0	29	49	54
BASSE	047/2014	P51	NA	NA	4/20/2016	S1	Not initiated on ART	Not initiated on ART	NA		NA		NA					0	0	0	0	0		PMTCT register was not found and is not capture in PMTCT ART and Infant ARV register
BASSE	773/2015	P52	NA	NA	5/24/2016	S1	Not initiated on ART	Not initiated on ART	NA		NA		NA					7	6	0	0	0		PMTCT no. 773/15 is HIV negative in the register and no information was available
BASSE	846/2016 Cado	P53	NA	NA	1/24/2018	S1	NA	NA	NA				NA					7	40	0	0	0		no record could be found except in lab records
BASSE	0697/2011	P54	NA	NANA	3/22/2018	S1	Not initiated on ART	Not initiated on ART	NA		NA		NA					87	36	0	0	0		PMTCT no. 0697/11 is HIV negative in the register and no information was available
BASSE	990/2018	P55	F	Gambian	3/18/2019	S1	Not initiated on ART	Not initiated on ART	NA		NA		NA					0	0	0	0	0		PMTCT 990/18 is HIV negative in the register but the same Pt was given PMTCT no 854/15 which is HIV positive ans the child`s EID result is recorded SO in the mother`s folder despite with original HIV-1 result
BAJAKUNDA	209/20 15	P56	M	Gambian	4/20/2016	S1	Not initiated on ART	Not initiated on ART	NA		NA		Death					4	38	5	0	0		The child was last see at the facility on OCT.2016 after receipt of result subsequently died but no recorded death day mother dined start of ART for the child
JANJANGBUREH	0444/2018	P57	M	Gambian	11/13/2018	S1	Not initiated on ART	Loss to follow-up	NA		NA		NA					13	9	1	0	0		mother-child pair Loss to follow-up since June 2019 when the chile was last seen but the mother still deny start of ART for the child
BANSANG	.0006/2019	P58	M	Gambian	2019-04-01	S1	2/21/2019	Default	NA		NA		NA					4	0	0	6	6	11	mother-child Default and Loss to follow-up since June 2019 to date
BANSANG	0729/2017	P59	M	Senegalese	5/16/2019	S1	Not initiated on ART	Loss to follow-up	NA		NA		Alive					71	0	0	0	0		Yet to be on ART as the CHILD`S test results was still at the RCH despite being visited and promised to report
SKH/C	2829/2018	P60	M	Gambian	8/28/2019	S1	Not initiated on ART	Loss to follow-up	NA		NA		NA					7	19	11	0	0		2nd child of the same patient of the number 2788/2016 communicated but cannot be reached thus Loss to follow-up
SKH/C	2683/2016	P61	M	Gambian	3/22/2018	S1	Not initiated on ART	Not initiated on ART	NA		NA		NA					11	53	0	0	0		Results was receive and recorded and was letter change to HIV negative but no date of receipt of result was in record
SKH/C	311/2015	P62	NA	NA	8/26/2015	S1	NA	NA	NA				NA					10	1	0	0	0		No records could be found except in lab records
SKH/C	2788/2016	P63	F	Gambian	3/22/2018	S1	Not initiated on ART	Not initiated on ART	NA		NA		Death					7	54	2	0	0		The mother-child pair was last seen in May 2017 before the receipt of result and subsequently died but no recorded death day
BWIAM	0020/2011	P64	F	Gambian	2016-09-08	S1	Not initiated on ART	Loss to follow-up	NA		NA		Alive					14	3	27	0	0		Mother Default since March 2017 Reason Denial thus mother-child pair Loss to follow-up despite being frequently seen at the facility
BWIAM	0109/2015	P65	F	Gambian	2016-09-08	S1	2018-06-04	Complete Adherence	418	7/20/2018	NA	7/20/2018	Alive	630	2018-03-01	Target Target not detected	2018-03-01	30	3	27	59	90	120
BWIAM	20160236	P66	M	Gambian	2016-09-08	S1	2018-08-06	Complete Adherence	NA		NA		Alive	1582	2019-09-12	891251	.9/12/2019	18	1	27	68	97	115
BWIAM	0067/2019	P67	M	Gambian	5/27/2019	S1	12/31/2019	Complete Adherence	NA		NA		Alive	460	12/31/2019	309030	12/31/2019	6	7	7	24	39	45	Ag/Ab test 7/8/19 but indetermine result and was consider HIV negative and discharge from that day but recalled in 12/2019 for confirmatory test and confirm HIV-1 positive THUS start ART 31/12/2019
BWIAM	.0003/2018	P68	F	Gambian	5/27/2019	S1	5/31/2019	Complete Adherence	596	NA	NA		Death					27	11	0	0	12	39	Mother was catch up post delivery and child Died 12/26/2019 aprex.over 6months on ART from initiated date
BWIAM	00106/2018	P69	M	Gambian	5/27/2019	S1	9/25/2019	Complete Adherence	NA		NA		Alive	1267	2020-06-03			10	7	0	16	24	35
BWIAM	0105/2014	P70	M	Gambian	2/13/2019	S1	2/27/2019	Complete Adherence	NA		NA		Alive	1305	2020-10-01	Target Target not detected	2020-10-01	6	5	0	1	7	14
BWIAM	20180233	P71	M	Gambian	5/30/2019	S1	6/17/2019	Complete Adherence	1418	2019-12-06	417	2019-03-09	Alive	1124	2020-03-01	239883	.3/1/2020	60	1	1	0	4	64
BWIAM	590/2016	P72	NA	NA	3/22/2018	S1	NA	NA	NA				NA					8	77	0	0	0		Not seen in the entire record except in lab records
BWIAM	.0005/2016	P73	NA	NA	1/24/2018	S1	NA	NA	NA				NA					5	37	0	0	0		Not seen in the entire record except in lab records
EFSTH	094/2017	P74	M	Guinean	2018-09-05	S1	2018-04-06	Default	NA		NA		NA					20	62	2	1	66	86	mother-child pair default since Oct. 2019 as the mother travel back to Guinea
EFSTH	103/2016	P75	F	Gambian	2016-09-08	S1	Not initiated on ART	Not initiated on ART	NA		NA		Death					12	10	5	0	0		child Died but no date of death in record but mother default since october 2016 appointment date that is after results was receive at ART clinic
EFSTH	013/2018	P76	M	Gambian	2018-08-08	S1	2018-12-10	Complete Adherence	NA		NA		Alive	>2000	12/23/2019	Target Target not detected	12/23/2019	5	9	3	6	18	24
EFSTH	066/2016	P77	M	Gambian	3/23/2018	S1	Not initiated on ART	Not initiated on ART	NA		NA		Death					12	68	3	0	0		Died 11/11/2017 before results was receive
EFSTH	078/	P78	NA	NA	2018-08-08	S1	NA	NA	NA				NA					0	135	0	0	0		No record could be found at the ART clinic except in lab records
EFSTH	105	P79	NA	NA	2018-08-08	S1	NA	NA	NA				NA					0	114	0	0	0		No record could be found at the ART clinic except in lab records
SIBANOR	10/249/2016	P80	F	Senegalese	5/17/2016	S1	Not initiated on ART	Loss to follow-up	NA		NA		NA					13	3	1	0	0		mother-child pair Lost to follow since after start of TB treatment ON 6/13/16 REASON mother is said to move to casamance.
SIBANOR	10/1735/2015	P81	F	Gambian	5/17/2016	S1	Not initiated on ART	Not initiated on ART	NA		NA		Death					6	46	1	0	0		mother default since after DBS collection and child died 6/26/2018 IN BWIAM on admission . Not initiated on ART at both facilitie B4 death
SIBANOR	10/1815/2015	P82	M	Gambian	2018-01-02	S1	7/18/2017	Complete Adherence	1278	12/20/2018	NA	12/20/2018	Alive	964	1/29/2019	407308	1/29/2019	98	33	3	0	4	103
SKGH	0241/	P83	F	Gambian	2016-02-07	S1	2017-04-05	Complete Adherence	NA		NA		Alive	1265	2020-09-01	25704	2020-09-01	19	3	41	2	47	67
SKGH	0215/2018	P84	M	Nigerian	2/13/2019	S1	Not initiated on ART	Loss to follow-up	NA		NA		NA					6	3	1	0			mother-child pair Loss to follow since after the receipt of results at RCH
SKGH	13/2970/19	P85	M	Nigerian	10/22/2019	S1	2020-10-02	Complete Adherence	NA		NA		Alive					51	3	9	6	19	70
SKGH	0520/2018	P86	M	Guinean	10/22/2019	S1	Not initiated on ART	Loss to follow-up	NA		NA		NA					87	4	9	0			Mother defaults since november 2019 thus mother-child pair Loss to follow-up that date
SKGH	1570/2018	P87	F	Gambian	2020-02-01	S1	1/30/2020	Complete Adherence	NA				Alive					57	4	1	2	8	65
SKGH	0512/2018	P88	M	Gambian	2020-02-01	S1	2020-03-02	Complete Adherence	NA				Alive					39	4	1	3	9	48
ESSAU	1860/2016	P89	F	Gambian	1/18/2018	S1	1/23/2018	Default	NA		NA		Alive					28	54	0	0	55	83	mother-child pair Default since 1/4/2018 reason afraid of being disclose to the husband
ESSAU	.0002/2018	P90	NA	NA	3/18/2019	S1	NA	NA	NA				NA					0	0	0	0	0		Not seen in all records except in lab records
ESSAU	0028/2017	P91	F	Gambian	2020-02-01	S1	2020-09-02	Complete Adherence	NA		NA		Alive					6	7	1	4	12	19
SOS	11/0335/2017	P92	M	Nigerian	5/16/2019	S1	Not initiated on ART	Loss to follow-up	NA		NA		NA					79	1	0	0	0		mother denial of treatment for the child AND Loss to follow-up after receipt of result i.e. since June 2019
SOS	11/0152/17	P93	F	Gambian	1/24/2018	S1	2018-02-05	Default	NA		NA		Alive					13	11	3	11	25	38	mother-child pair Default since 6/12/2019 reason fear of discloser to husban thus stop receiving RX for her child
SOS	04260/12	P94	M	Gambian	5/16/2019	S1	Not initiated on ART	Loss to follow-up	NA		NA		NA					15	1	0	0	0		mother Denial of treatment for the after receipt of result and finally Loss to follow-up since 11/2/2019
BANJULINDING	029/2015	P95	M	Gambian	4/20/2016	S1	Not initiated on ART	Loss to follow-up	NA		NA		NA					63	4	1	0	0		mother denial of treatment for the child and thus Loss to follow-up since June 2016 after the receipt of results
Comments
